# Supplementary material for: MYC Causes Multiple Myeloma Progression via Attenuating TP53-Induced MicroRNA-34 Expression
Source: MDPI journal article supplement (doi:10.3390/genes14010100), 2022-12-29
Supplement: s1 [file s1]

## Supplementary Results

*p53* protein accumulation and *p53* overexpression upregulated primary and mature miR-34 in human multiple myeloma cell lines (HMCLs)

Western blot analysis verified increased p53 protein in MM.1S, KMS27 but not changed in KMS28BM, KMS26 and OPM2 by the treatment with nutlin-3. p53 protein was not detected in KMS11 (**Figure S1A**).

A

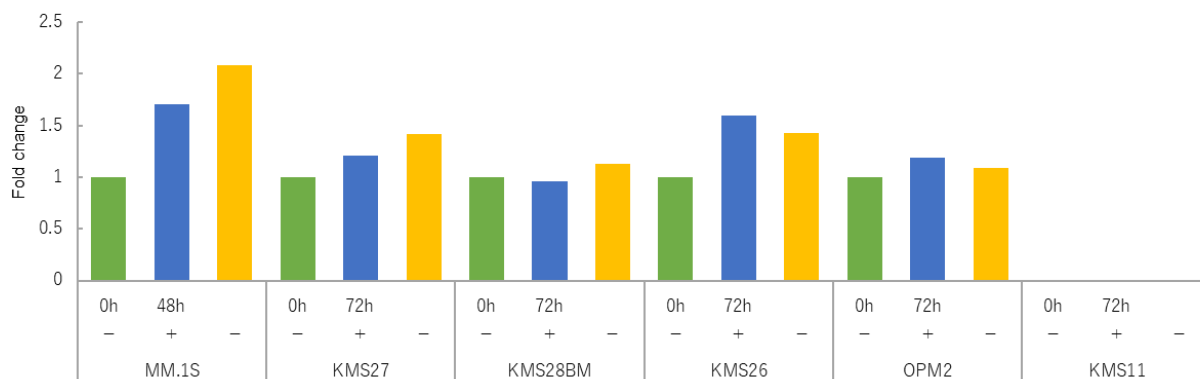

**Figure S1.** Changes in p53 protein expression in response to nutlin-3 in six myeloma cell lines. MM.1S was treated for 0, 48 h with nutlin-3 at concentrations of 0  $\mu$ M and 1  $\mu$ M. KMS27, KMS28BM, KMS26, OPM2 and KMS11 were treated for 0, 72 h with nutlin-3 at 0  $\mu$ M and 10  $\mu$ M. Green, for 0h with 0 $\mu$ M nutlin-3; Blue, for 48 or 72 h with 0  $\mu$ M nutlin-3; yellow, for 48 or 72 h with 1 or 10  $\mu$ M nutlin-3. ND: Not Detected.

*Osteosarcoma cell line and HMCLs proliferation after treatment with MDM2 inhibitor nutlin-3*

In TP53 wild-type cell line U2OS and MM.1S, nutlin-3 markedly reduced cell proliferation (**Figure S2A, B**). For those cell lines, 10 $\mu$ M nutlin-3 were too toxic and resulted in cell death at 72h. In KMS27, KMS28BM, KMS26, OPM2, and KMS11, proliferation was not significantly increased by 10 $\mu$ M nutlin-3 (**Figure S2C-G**).

A U2OS

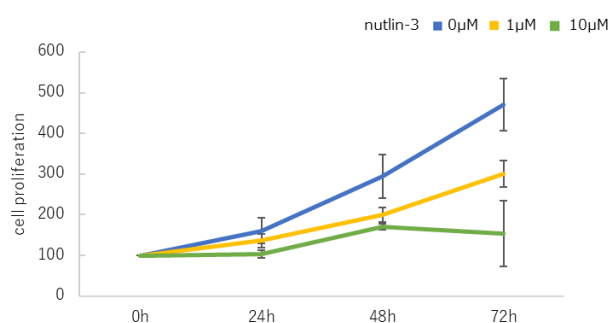

B MM.1S

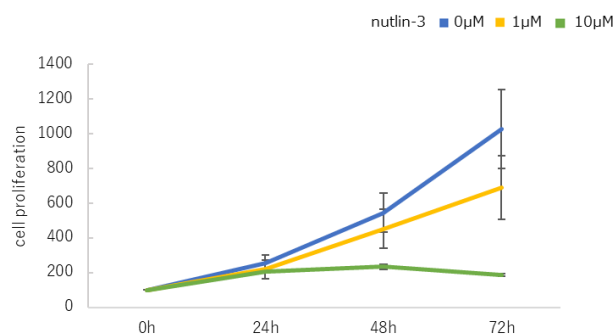

C KMS27

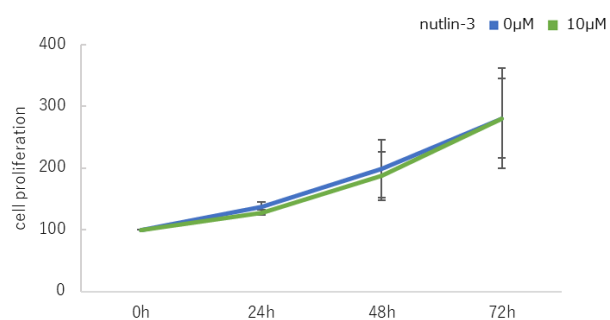

D KMS28BM

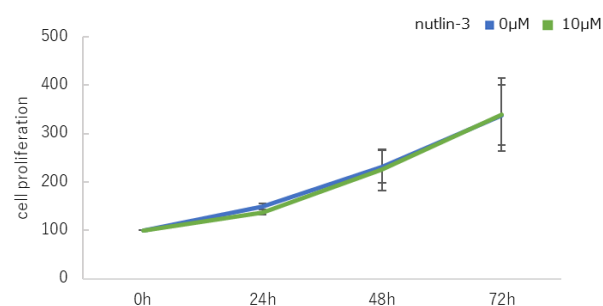

E KMS26

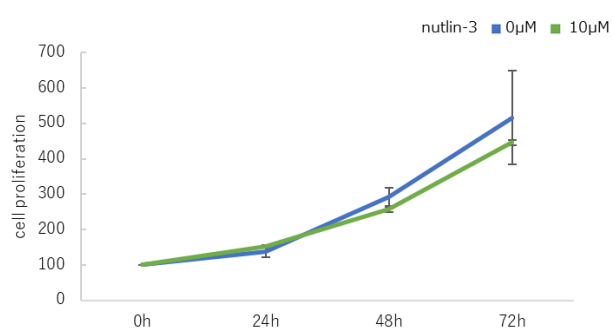

F OPM2

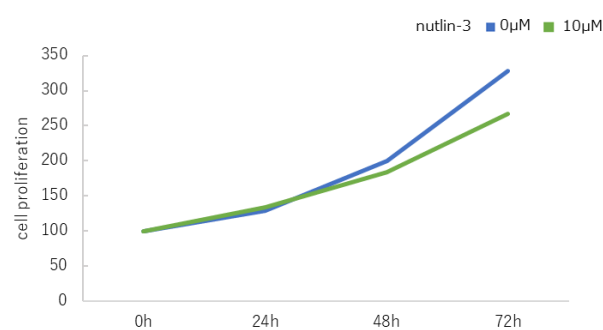

G KMS11

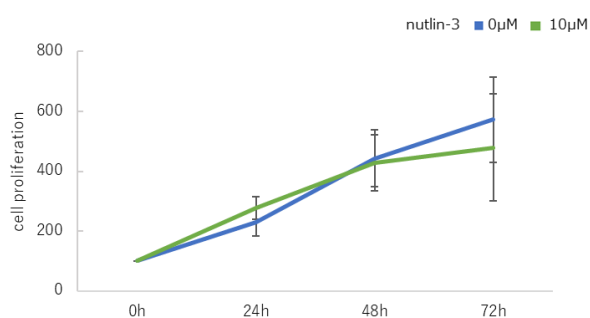

**Figure S2.** Effects of nutlin-3 for cell proliferation. (A) U2OS, (B) MM.1S, (C) KMS27, (D) KMS28BM, (E) KMS26, (F) OPM2 and (G) KMS11 were treated for 0h-72h with nutlin-3 0μM, 1μM, 10μM. Only experiments with OPM2 were performed twice. Other experiments were performed in triplicate. Error bars show the standard deviation (SD) across those experiments. Blue line, 0μM; yellow line, 1 μM; green line, 10 μM.
